# Supplementary material for: Rural–urban correlates of skilled birth attendance utilisation in Sierra Leone: evidence from the 2019 Sierra Leone Demographic Health Survey
Source: HighWire-hosted journal article supplement (doi:10.1136/bmjopen-2021-056825), 2022-03-01
Supplement: bmjopen-2021-056825supp003_data_supplement.pdf [file bmjopen-2021-056825supp003_data_supplement.pdf]

**Table 1: Factors associated with non-utilisation of skilled birth attendance in Sierra Leone as per the 2019 SLDHS**

| Characteristics               | Crude model<br>cOR (95% CI) | P-value | Adjusted model<br>aOR (95% CI) |
|-------------------------------|-----------------------------|---------|--------------------------------|
| <b>Age</b>                    |                             | <0.001  |                                |
| 35 to 49                      | 1                           |         | 1                              |
| 20 to 34                      | <b>0.7 (0.6-0.9)</b>        |         | 0.9 (0.8-1.2)                  |
| 15 to 19                      | <b>0.6 (0.4-0.8)</b>        |         | 0.9 (0.6-1.4)                  |
| <b>Residence</b>              |                             | <0.001  |                                |
| Urban                         | 1                           |         | <b>1</b>                       |
| Rural                         | <b>3.5 (2.6-4.8)</b>        |         | <b>1.8 (1.2-2.7)</b>           |
| <b>Visited by fieldworker</b> |                             | 0.006   |                                |
| Yes                           | 1                           |         | <b>1</b>                       |
| No                            | <b>1.4 (1.1-1.8)</b>        |         | <b>1.3 (1.1-1.7)</b>           |
| <b>Region</b>                 |                             | <0.001  |                                |
| Western                       | 1                           |         | 1                              |
| Southern                      | <b>2.3 (1.4-3.8)</b>        |         | <b>0.5 (0.3-0.9)</b>           |
| North-western                 | <b>6.8 (4.4-10.6)</b>       |         | <b>1.8 (1.2-2.9)</b>           |
| Northern                      | <b>2.1 (1.3-3.4)</b>        |         | 0.6 (0.4-1.0)                  |
| Eastern                       | 1.0 (0.5-1.9)               |         | <b>0.3 (0.2-0.5)</b>           |
| <b>Religion</b>               |                             |         |                                |
| Islam                         | 1                           | 0.006   | 1                              |
| Christianity and others       | <b>0.7 (0.5-0.9)</b>        |         | 1.3 (0.9-1.8)                  |
| <b>Sex household head</b>     |                             | 0.012   |                                |
| Male                          | 1                           |         | 1                              |
| Female                        | <b>0.8 (0.6-0.9)</b>        |         | 1.0 (0.8-1.3)                  |
| <b>Household Size</b>         |                             | 0.006   |                                |
| 7 and above                   | 1                           |         | 1                              |
| Less than 7                   | <b>0.8 (0.6-0.9)</b>        |         | 0.8 (0.7-1.1)                  |
| <b>Working status</b>         |                             | 0.002   |                                |
| Not working                   | 1                           |         | 1                              |
| Working                       | <b>1.5 (1.2-2.0)</b>        |         | 1.10 (0.8-1.4)                 |
| <b>Marital status</b>         |                             | <0.001  |                                |
| Not married                   | 1                           |         | 1                              |
| Married                       | <b>1.7 (1.4-2.2)</b>        |         | 1.10 (0.8-1.4)                 |
| <b>Education Level</b>        |                             | <0.001  |                                |
| No Education                  | 1                           |         | 1                              |
| Primary                       | <b>0.7 (0.6-0.9)</b>        |         | 0.9 (0.7-1.1)                  |
| Secondary                     | <b>0.3 (0.3-0.5)</b>        |         | <b>0.6 (0.4-0.8)</b>           |
| Tertiary                      | <b>0.2 (0.1-0.4)</b>        |         | 0.5 (0.2-1.3)                  |
| <b>Wealth Index</b>           |                             | <0.001  |                                |
| Richest                       | 1                           |         | 1                              |
| Richer                        | <b>1.9 (1.2-3.2)</b>        |         | 1.5 (0.9-2.4)                  |
| Middle                        | <b>3.8 (2.3-6.3)</b>        |         | 1.5 (0.9-2.6)                  |
| Poorer                        | <b>4.9 (3.0-8.2)</b>        |         | 1.6 (0.9-2.9)                  |
| Poorest                       | <b>5.1 (3.1-8.4)</b>        |         | <b>1.9 (1.1-3.4)</b>           |

|                                    |                      |        |                      |
|------------------------------------|----------------------|--------|----------------------|
| <b>Parity</b>                      |                      | <0.001 |                      |
| 5 and above                        | 1                    |        | 1                    |
| 2-4                                | <b>0.8 (0.6-0.9)</b> |        | 1.1 (0.9-1.4)        |
| 1                                  | <b>0.5 (0.4-0.7)</b> |        | 0.9 (0.7-1.2)        |
| <b>Exposure to media</b>           |                      | <0.001 |                      |
| Yes                                | 1                    |        | 1                    |
| No                                 | <b>2.2 (1.8-2.8)</b> |        | <b>1.5 (1.2-1.9)</b> |
| <b>Permission to access</b>        |                      | 0.164  |                      |
| Big problem                        | 1                    |        | 1                    |
| Not big problem                    | 0.8 (0.7-1.1)        |        | 1.3 (1.0-1.7)        |
| <b>Distance to health facility</b> |                      | <0.001 |                      |
| Big problem                        | 1                    |        | 1                    |
| Not big problem                    | <b>0.4 (0.3-0.5)</b> |        | <b>0.5 (0.4-0.6)</b> |
| <b>ANC timing<sup>a</sup></b>      |                      | <0.001 |                      |
| First trimester                    | 1                    |        | 1                    |
| After first trimester              | <b>1.4 (1.2-1.8)</b> |        | <b>1.3 (1.1-1.6)</b> |
| <b>ANC attendance</b>              |                      | 0.787  |                      |
| 8 contacts and above               | 1                    |        | -                    |
| Less than 8                        | 1.0 (0.8-1.3)        |        |                      |

**bold**= Significant at p-value <0.05, aOR: Adjusted odds ratio. cOR: Crude Odds

Ratio
